# Supplementary material for: Whole-genome profiling of nasopharyngeal carcinoma reveals viral-host co-operation in inflammatory NF-κB activation and immune escape
Source: PubMed Central journal article supplement (PMC8263564; doi:10.1038/s41467-021-24348-6), 2021-07-07
Supplement: 41467_2021_24348_MOESM2_ESM.pdf [file 41467_2021_24348_MOESM2_ESM.pdf]

## Descriptions of Additional Supplementary Files

### **Supplementary Data 1**

**Description:** Clinicopathological details of NPC patients.

### **Supplementary Data 2**

**Description:** Simple somatic mutations in NPC samples.

### **Supplementary Data 3**

**Description:** Validation of sequence variants by target-captured sequencing.

### **Supplementary Data 4**

**Description:** Gene-wise thresholded copy-number calls in NPC samples.

### **Supplementary Data 5**

**Description:** Structural alterations in NPC samples.

### **Supplementary Data 6**

**Description:** Clinicopathological details and MTAP status of 50 recurrent NPC tumors.

### **Supplementary Data 7**

**Description:** Primers and probe for quantitative RT-PCR analysis.
